# Supplementary material for: Accelerating the reaction kinetics of Ni 1− x O/Ni(OH) 2 /NF by defect engineering for urea-assisted water splitting
Source: Royal Society of Chemistry journal article supplement (doi:10.1039/d4dt02871f), 2024-10-31
Supplement: d4dt02871f1.pdf [file d4dt02871f1.pdf]

Electronic Supplementary Material (ESI) for Dalton Transactions.

This journal is © The Royal Society of Chemistry 2023

## Supplementary Information

### Accelerating the reaction kinetics of $\text{Ni}_{1-x}\text{O}/\text{Ni}(\text{OH})_2/\text{NF}$ by defect engineering for urea-assisted water splitting

*Yuan Rui,<sup>a</sup> Zong Li,<sup>a</sup> Miaohui Wang,<sup>a</sup> Yunxia Liu,<sup>\*,b</sup> Haiping Lin,<sup>a</sup> Peipei Huang<sup>\*,a</sup> and Qing Li<sup>\*,a</sup>*

<sup>a</sup>School of Physics and Information Technology, Shaanxi Normal University, Xi'an, 710119, P. R. China

<sup>b</sup>School of Chemistry and Chemical Engineering, Northwestern Polytechnical University, Xi'an, 710072, P. R. China.

\*Corresponding author: [yxliu@nwpu.edu.cn](mailto:yxliu@nwpu.edu.cn); [huangpeipei@snnu.edu.cn](mailto:huangpeipei@snnu.edu.cn); [liqing@snnu.edu.cn](mailto:liqing@snnu.edu.cn);

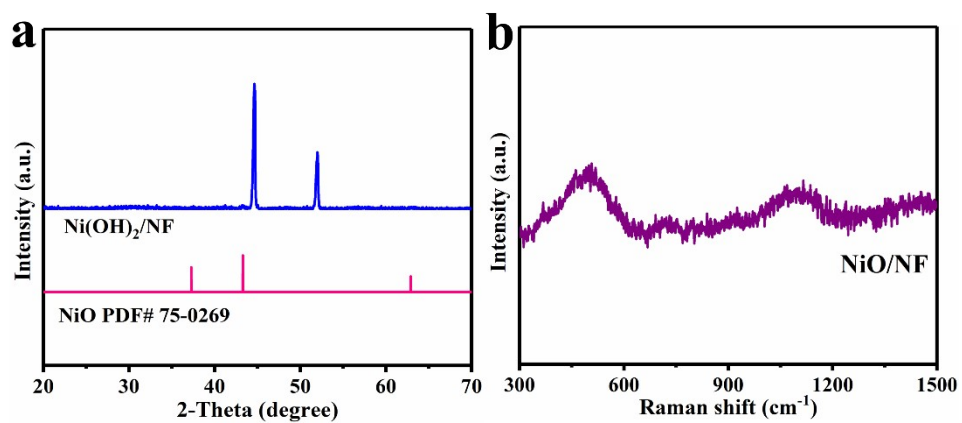

**Fig. S1** (a) The XRD pattern of Ni(OH)<sub>2</sub>/NF. (b) The Raman spectrum of NiO/NF.

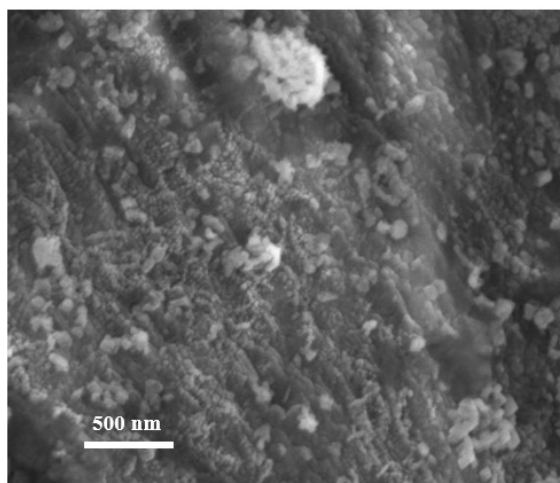

**Fig. S2** The SEM image of Ni(OH)<sub>2</sub>/NF.

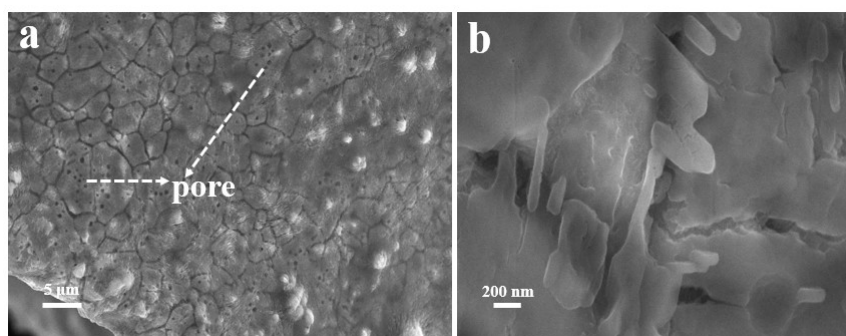

**Fig. S3** SEM images at different magnifications of treated nickel foam (a, b).

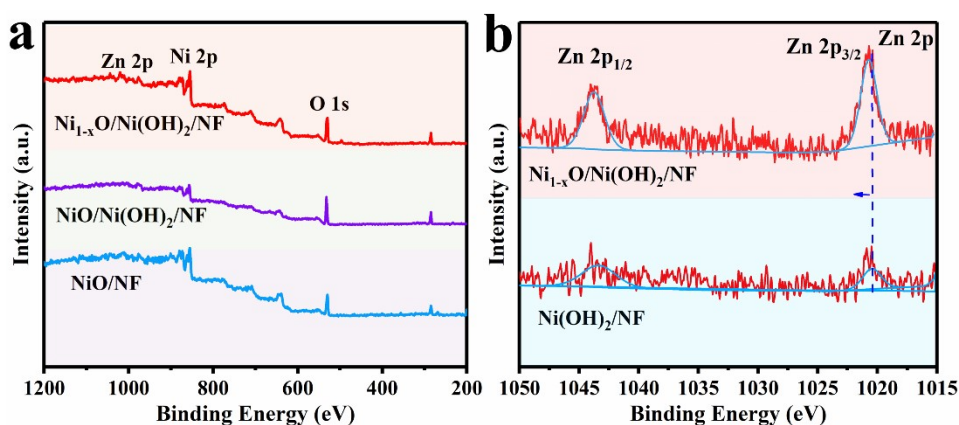

**Fig. S4** (a) XPS survey spectra of  $\text{NiO}/\text{NF}$ ,  $\text{NiO}/\text{Ni}(\text{OH})_2/\text{NF}$  and  $\text{Ni}_{1-x}\text{O}/\text{Ni}(\text{OH})_2/\text{NF}$ . (b) High-resolution Zn 2p XPS spectra of  $\text{Ni}_{1-x}\text{O}/\text{Ni}(\text{OH})_2/\text{NF}$  and  $\text{Ni}(\text{OH})_2/\text{NF}$ .

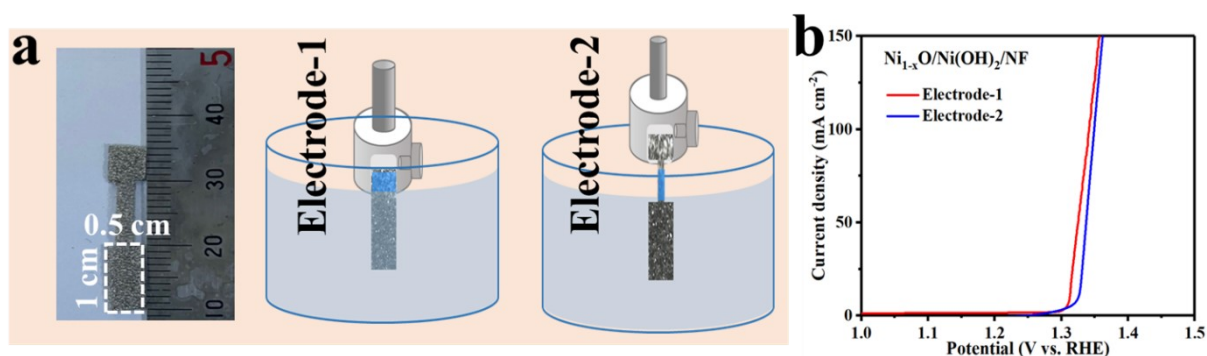

**Fig. S5** (a) A representative digital photograph of the working electrode with a specifically designed shape. The schematic diagram illustrates the application of the working electrode in UOR performance measurement without (electrode-1) and with (electrode-2) the special shape. (b) LSV curves acquired with electrode-1 and electrode-2 loading with  $\text{Ni}_{1-x}\text{O}/\text{Ni}(\text{OH})_2/\text{NF}$ .

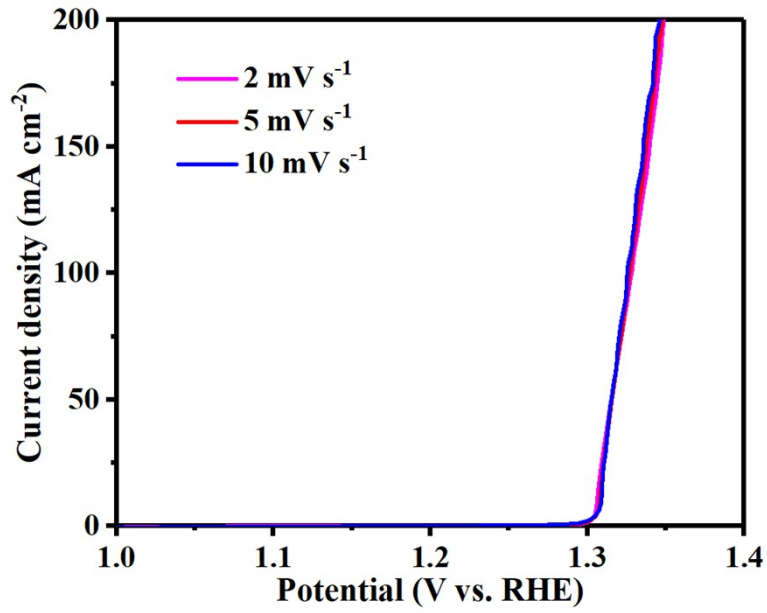

**Fig. S6** UOR polarization curves of Ni<sub>1-x</sub>O/Ni(OH)<sub>2</sub>/NF in 1 M KOH with 0.33 M urea at scanning rates of 10 mV s<sup>-1</sup>, 5 mV s<sup>-1</sup> and 2 mV s<sup>-1</sup>, respectively.

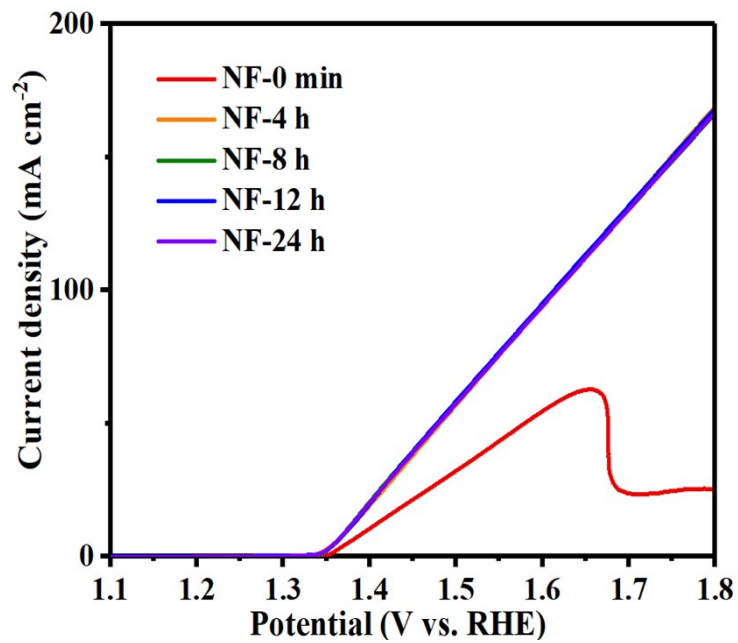

**Fig. S7** LSV curves of NF with different acid etching time durations.

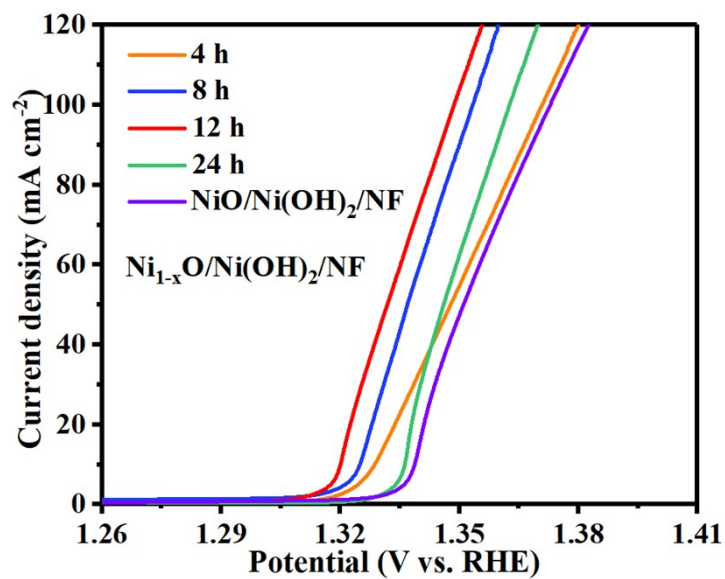

**Fig. S8** LSV curves of  $\text{Ni}_{1-x}\text{O}/\text{Ni}(\text{OH})_2/\text{NF}$  with different acid etching times and  $\text{NiO}/\text{Ni}(\text{OH})_2/\text{NF}$ .

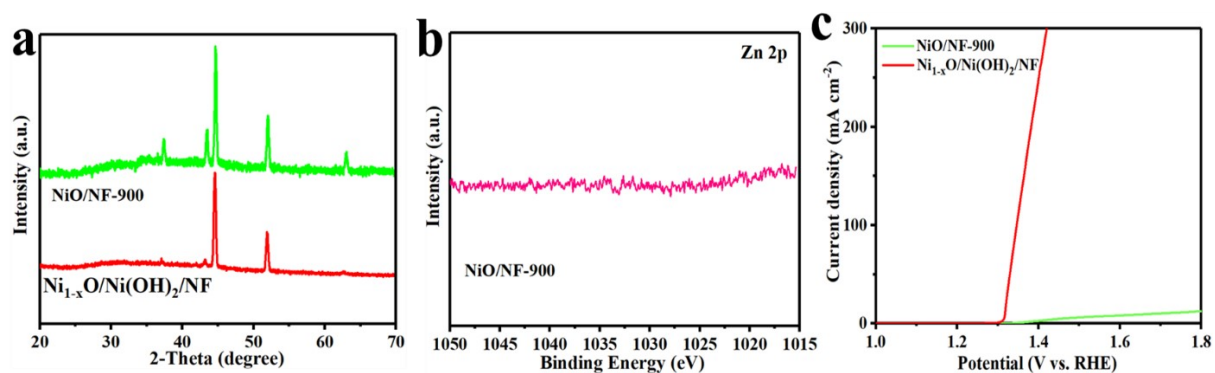

**Fig. S9** (a) XRD patterns of  $\text{NiO}/\text{NF-900}$  and  $\text{Ni}_{1-x}\text{O}/\text{Ni}(\text{OH})_2/\text{NF}$ . (b) The high-resolution Zn 2p XPS spectrum of  $\text{NiO}/\text{NF-900}$ . (c) LSV curves of  $\text{NiO}/\text{NF-900}$  and  $\text{Ni}_{1-x}\text{O}/\text{Ni}(\text{OH})_2/\text{NF}$ .

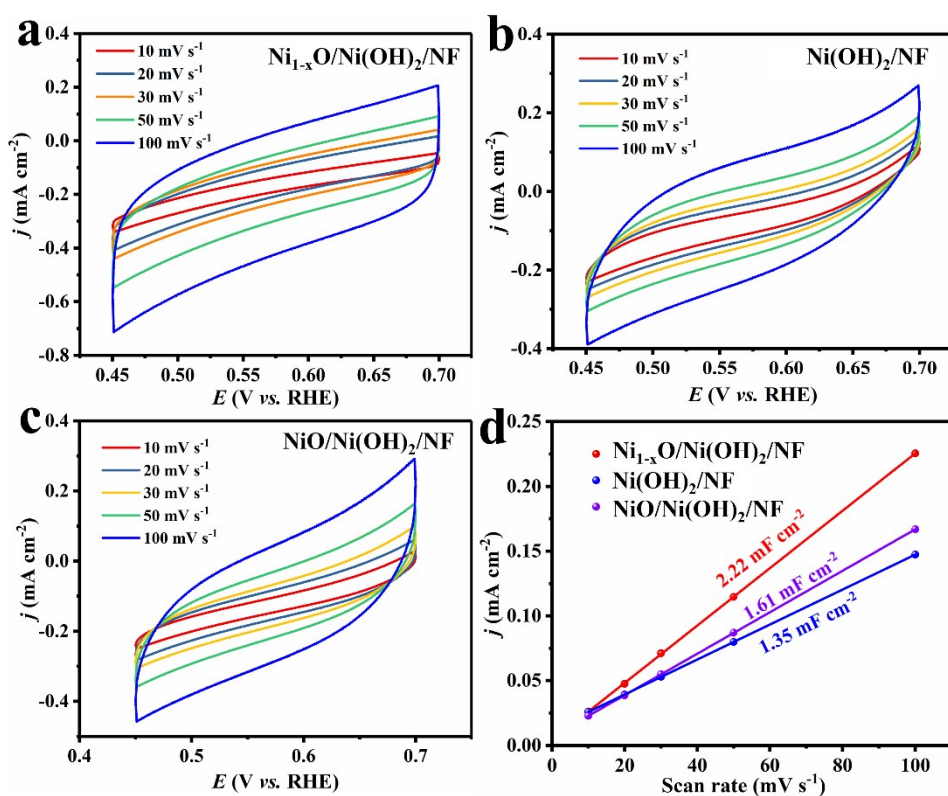

**Fig. S10** CV curves for (a)  $\text{Ni}_{1-x}\text{O}/\text{Ni}(\text{OH})_2/\text{NF}$ , (b)  $\text{Ni}(\text{OH})_2/\text{NF}$ , and (c)  $\text{NiO}/\text{Ni}(\text{OH})_2/\text{NF}$  at different scan rates in the non-faradaic potential region. (d) Linear relationships between the capacitive current and the scan rate of catalysts.

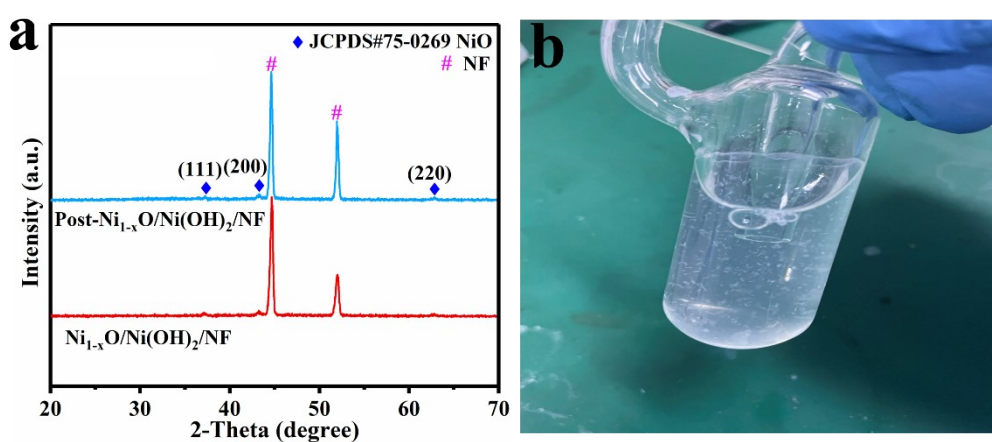

**Fig. S11** XRD patterns of the Post- $\text{Ni}_{1-x}\text{O}/\text{Ni}(\text{OH})_2/\text{NF}$  and  $\text{Ni}_{1-x}\text{O}/\text{Ni}(\text{OH})_2/\text{NF}$ . (b) The digital photograph during the chronopotentiometry test of  $\text{Ni}_{1-x}\text{O}/\text{Ni}(\text{OH})_2/\text{NF}$ , in which the saturated  $\text{Ca}(\text{OH})_2$  solution became turbid, signifying the production of  $\text{CO}_2$ .<sup>1</sup>

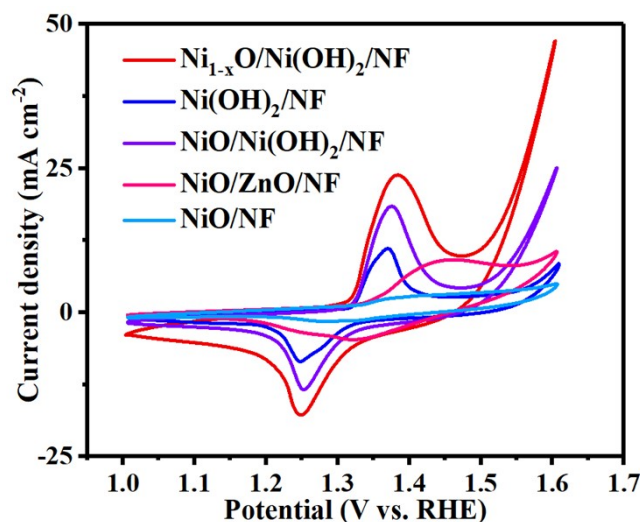

**Fig. S12** CV curves of  $\text{Ni}_{1-x}\text{O}/\text{Ni}(\text{OH})_2/\text{NF}$ ,  $\text{Ni}(\text{OH})_2/\text{NF}$ ,  $\text{NiO}/\text{Ni}(\text{OH})_2/\text{NF}$ ,  $\text{NiO}/\text{ZnO}/\text{NF}$  and  $\text{NiO}/\text{NF}$  in 1 M KOH with  $10 \text{ mV s}^{-1}$ .

$\text{Ni}^{2+}$  sites are firstly electrochemically oxidized to high-valent  $\text{Ni}^{3+}$  species in the forward scanning, and  $\text{Ni}^{3+}$  species then chemically oxidize urea molecules with themselves being reduced back to  $\text{Ni}^{2+}$ . As shown in Fig. S12, the CV curve of  $\text{Ni}_{1-x}\text{O}/\text{Ni}(\text{OH})_2/\text{NF}$  exhibits the largest oxidation peak, suggesting most  $\text{Ni}^{3+}$  sites are generated in  $\text{Ni}_{1-x}\text{O}/\text{Ni}(\text{OH})_2/\text{NF}$  and conducive to a great UOR performance.

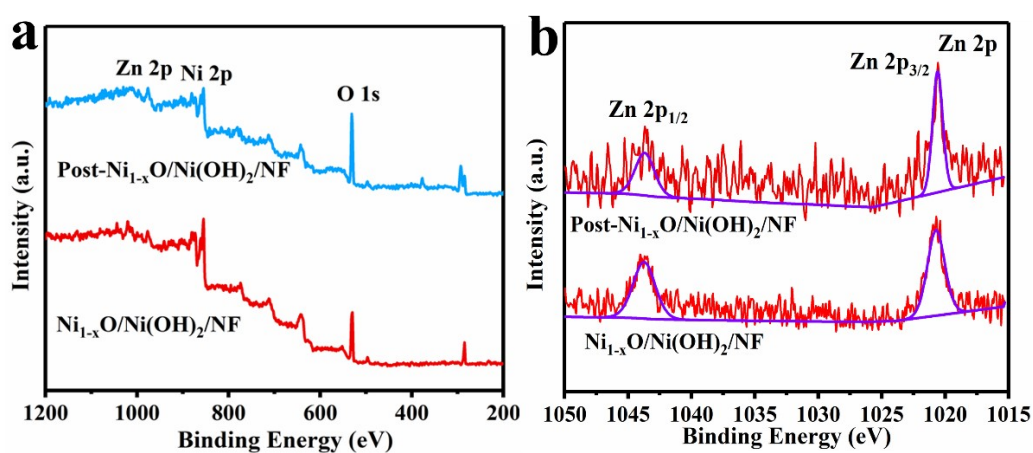

**Fig. S13** (a) XPS survey spectra and (b) high-resolution XPS spectra of Zn 2p for  $\text{Ni}_{1-x}\text{O}/\text{Ni}(\text{OH})_2/\text{NF}$  and  $\text{Post-Ni}_{1-x}\text{O}/\text{Ni}(\text{OH})_2/\text{NF}$ .



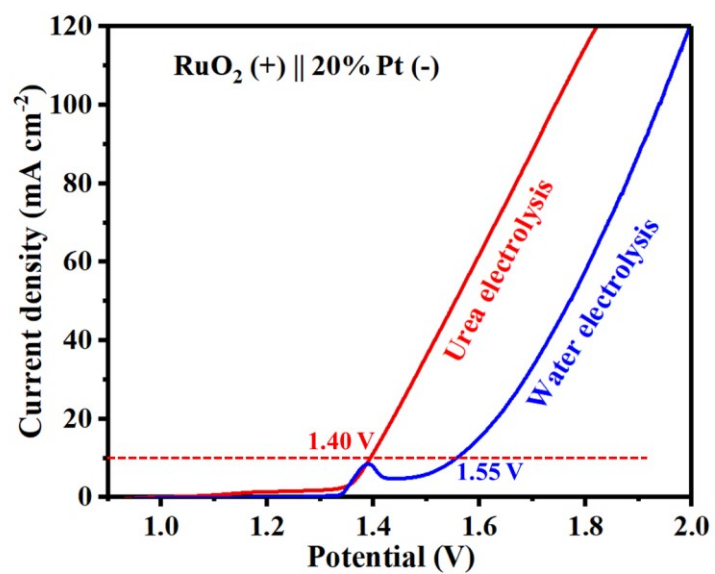

**Fig. S14** Two-electrode polarization curves for water splitting and urea splitting of commercial RuO<sub>2</sub> (+) || 20% Pt/C (-).



**Table S1.** Element Zn, Ni and O contents of Ni<sub>1-x</sub>O/Ni(OH)<sub>2</sub>/NF with different acid etching times.

| Catalysts                                        | Element | Atomic%* |
|--------------------------------------------------|---------|----------|
| 4 h                                              | Ni      | 28.36    |
|                                                  | Zn      | 4.94     |
|                                                  | O       | 66.70    |
| 8 h                                              | Ni      | 28.32    |
|                                                  | Zn      | 3.51     |
|                                                  | O       | 68.17    |
| 12 h                                             | Ni      | 25.44    |
|                                                  | Zn      | 2.88     |
|                                                  | O       | 71.68    |
| 24 h                                             | Ni      | 26.92    |
|                                                  | Zn      | 1.55     |
|                                                  | O       | 71.53    |
| Post-Ni <sub>1-x</sub> O/Ni(OH) <sub>2</sub> /NF | Ni      | 21.90    |
|                                                  | Zn      | 2.72     |
|                                                  | O       | 75.38    |

\*These values were estimated by XPS.

**Table S2.** Comparison of UOR performances of Ni<sub>1-x</sub>O/Ni(OH)<sub>2</sub>/NF with recent reported electrocatalysts.

| Catalysts                                                  | Potential (vs. RHE)   | Tafel slope (mV dec <sup>-1</sup> ) | Reference                                                  |
|------------------------------------------------------------|-----------------------|-------------------------------------|------------------------------------------------------------|
| Ni <sub>1-x</sub> O/Ni(OH) <sub>2</sub> /NF                | 1.317@10<br>1.346@100 | 18.7                                | <i>This work</i>                                           |
| Ir/NiPS <sub>3</sub>                                       | 1.36@10               | 21.1                                | <i>Nat. Communt.</i> <b>2024</b> , 15, 2851.               |
| Ni(OH) <sub>2</sub> /g-C <sub>3</sub> C <sub>4</sub>       | 1.361@10              | /                                   | <i>Small</i> <b>2024</b> , 2401053.                        |
| LaNiO <sub>3</sub> -NiO                                    | 1.34@10               | 39.87                               | <i>ACS Materials Lett.</i> <b>2024</b> , 6, 1029-1041.     |
| Pt-Ni(OH) <sub>2</sub> @Ni-CNFs-2                          | 1.363@10              | 13.4                                | <i>Energy Environ. Sci.</i> , <b>2024</b> . 17, 1984-1996. |
| pt-NFS                                                     | 1.37@10               | 49.87                               | <i>Small Methods</i> <b>2024</b> , 2301434.                |
| V-Co <sub>2</sub> P <sub>4</sub> O <sub>12</sub> /CC       | 1.33@10               | 50                                  | <i>Adv. Funct. Mater.</i> <b>2024</b> , 2313974.           |
| CF@CoOS-2                                                  | 1.36@10               | 155                                 | <i>Small</i> <b>2024</b> , 2310112.                        |
| a-RuO <sub>2</sub> /NiO                                    | 1.334@10              | 34.8                                | <i>ACS Nano</i> <b>2024</b> , 18, 1214-1225.               |
| NiB <sub>x</sub>                                           | 1.40@100              | 22.8                                | <i>Adv. Funct. Mater.</i> <b>2024</b> , 2411011.           |
| Ni SAs-NC                                                  | 1.39@10               | 42                                  | <i>Appl. Catal. B. Environ</i> <b>2022</b> , 310, 121352.  |
| NiO/CuO@CuM                                                | 1.35@10               | 32.2                                | <i>Nano Energy</i> <b>2023</b> , 115, 108714.              |
| Cu <sub>0.5</sub> Ni <sub>0.5</sub> /NF                    | 1.33@10               | 22.77                               | <i>Small</i> <b>2023</b> , 19, 2300959.                    |
| Co/CoSe <sub>2</sub> @CNx                                  | 1.34@10               | -                                   | <i>J. Mater. Chem. A</i> , <b>2023</b> , 11, 5179-5187.    |
| WM-Ni <sub>0.99</sub> Co <sub>0.01</sub> (OH) <sub>2</sub> | 1.37@10               | 31                                  | <i>Energy Environ. Mater.</i> <b>2023</b> , 0, e1257.      |
| Ni/W <sub>5</sub> N <sub>4</sub> /NF                       | 1.34@10               | 35.8                                | <i>Appl. Catal. B. Environ.</i> <b>2023</b> , 323, 122168. |
| Ni <sub>0.05</sub> /CW                                     | 1.36@10               | 20.93                               | <i>J. Energy Chem.</i> <b>2023</b> , 76, 566-575.          |
| Cu-NiFe LDH                                                | 1.35@onset            | 26                                  | <i>Adv. Energy Mater.</i> <b>2024</b> , 2403004.           |
| Ni(OH)S/NF                                                 | 1.34@10               | -                                   | <i>Appl. Catal. B. Environ.</i> <b>2022</b> , 312, 121389. |
| Rh/NiV-LDH                                                 | 1.33@10               | 36                                  | <i>Sci. Bulletin</i> <b>2022</b> , 67, 1763-1775.          |

Table S3. Comparison of urea electrolysis performances of Ni<sub>1-x</sub>O/Ni(OH)<sub>2</sub>/NF || 20% Pt/C with that of previously reported catalysts.

| Catalysts                                               | Current density<br>(mA/cm <sup>2</sup> ) | Potential(V) | Reference                                                  |
|---------------------------------------------------------|------------------------------------------|--------------|------------------------------------------------------------|
| Ni <sub>1-x</sub> O/Ni(OH) <sub>2</sub> /NF    20% Pt/C | 10                                       | 1.379        | This work                                                  |
| YNi-10    Pt/C                                          | 10                                       | 1.47         | ACS Appl. Mater. Interfaces <b>2024</b> , 16, 50937–50947. |
| V-Ni(OH) <sub>2</sub>    Pt foil                        | 10                                       | 1.50         | Adv. Funct. Mater. <b>2022</b> , 2209698                   |
| WN/Ni <sub>3</sub> N    Pt/C                            | 10                                       | 1.38         | Adv. Energy Mater. <b>2023</b> , 13, 2302452.              |
| NiFe-F-4    Pt/C                                        | 50                                       | 1.65         | J. Colloid Interf. Sci. <b>2022</b> , 615, 309-317.        |
| CrCoNiFe    Pt/C                                        | 10                                       | 1.485        | J. Mater. Sci. Technol. <b>2024</b> , 203, 97-107.         |
| aNi-cys (+)    Pt/C (-)                                 | 10                                       | 1.41         | J. Colloid Interf. Sci. <b>2025</b> , 679, 1141-1149.      |
| CoS-2    Pt/C                                           | 10                                       | 1.56         | Small <b>2024</b> , 20, 2310112.                           |
| Mo-FeNi LDH    Pt/C                                     | 10                                       | 1.38         | Small <b>2024</b> , 20, 2305877.                           |
| Ni/MNO-10    Pt/C                                       | 10                                       | 1.45         | Small Struct. <b>2023</b> , 4, 2300212.                    |
| FeNi-OH/Co(OH) <sub>2</sub> /NF    Pt/C                 | 10                                       | 1.44         | Appl. Surf. Sci. <b>2024</b> , 670, 160649.                |

## REFERENCE

- 1 Z. Ji, Y. Song, S. Zhao, Y. Li, J. Liu and W. Hu, ACS Catal., 2021, **12**, 569-579.
